TABLE S1. Clinical features of the CU strains used in the present study.

| Strain no. | Year          | Age (years) | Gender | Origin  | Site             | Microbiology                                                       | Treatment                                                                              | Outcome | Reference  |
|------------|---------------|-------------|--------|---------|------------------|--------------------------------------------------------------------|----------------------------------------------------------------------------------------|---------|------------|
| NZS1       | February 2005 | 9           | Female | Samoa   | Both knees       | <i>H. ducreyi</i> , cultured, and confirmed by 16S rDNA sequencing | Flucloxacillin with minimal improvement followed by benzyl penicillin                  | Healed  | (1)        |
| NZS2       | February 2006 | 6           | Female | Samoa   | Right lower calf | <i>H. ducreyi</i> , cultured, and confirmed by 16S rDNA sequencing | Flucloxacillin with minimal improvement followed by azithromycin                       | Healed  | (1)        |
| NZS3       | June 2006     | 5           | Female | Samoa   | Right ankle      | <i>H. ducreyi</i> , cultured, and confirmed by 16S rDNA sequencing | Flucloxacillin and erythromycin with minimal improvement followed by benzyl penicillin | Healed  | (1)        |
| NZS4       | February 2007 | 15          | Female | Samoa   | Left lower thigh | <i>H. ducreyi</i> , cultured, and confirmed by 16S rDNA sequencing | Samoan oil followed by flucloxacillin                                                  | Healed  | (2)        |
| NZV1       | May 2014      | 2           | Male   | Vanuatu | Not known        | <i>H. ducreyi</i> , cultured, and confirmed by 16S rDNA sequencing | No response to cephalexin; final treatment unknown                                     | Healed  | This study |

1. **Ussher JE, Wilson E, Campanella S, Taylor SL, Roberts SA.** 2007. *Haemophilus ducreyi* causing chronic skin ulceration in children visiting samoa. *Clinical Infectious Diseases* 44: 85.
2. **Gaston J, Roberts, SA, Humphreys, TL.** 2015. Molecular phylogenetic analysis of non-sexually transmitted strains of *Haemophilus ducreyi*. *PLoS One.* 10(3): e0118613.
