TABLE S2. Putative deletions in the genomes of CU strains relative to 35000HP.

| <b>Feature</b>       | <b>Reference position</b> | <b>Length (bp)<sup>a</sup></b> |
|----------------------|---------------------------|--------------------------------|
| Intergenic           | 213,567                   | 30                             |
| HD1034               | 825,958                   | 388                            |
| HD1278               | 1,040,857                 | 69                             |
| HD1528-HD1565        | 1,265,042                 | 20,193                         |
| HD1715               | 1,429,444                 | 196                            |
| <i>insB</i> & HD1973 | 1,645,354                 | 767                            |

<sup>a</sup>These deletions were present in all the 5 cutaneous ulcer strains sequenced in this study.
